# Supplementary material
Source: publisher site journal article supplement (https://www.dovepress.com/get_supplementary_file.php?f=219867.docx)
Supplement: Supplementary file 1 [file get_supplementary_file.php]

**Supplementary Material**

**
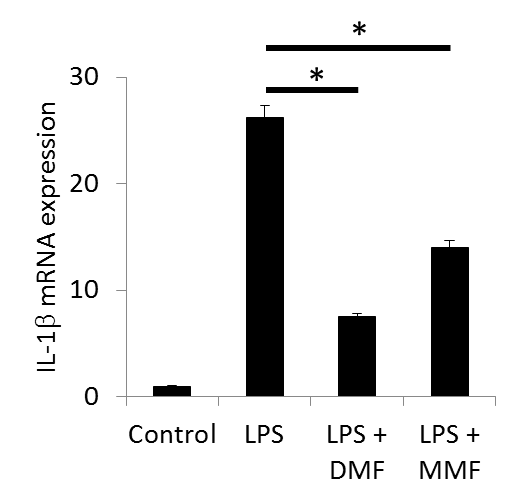
**

**Supplementary Figure 1.** DMF or MMF inhibits LPS-induced the expression of IL-1β mRNA in U937 cells. *P values <0.01 compare the mRNA expression in LPS-activated cells vs. those incubate with LPS in addition to DMF or MMF.

**
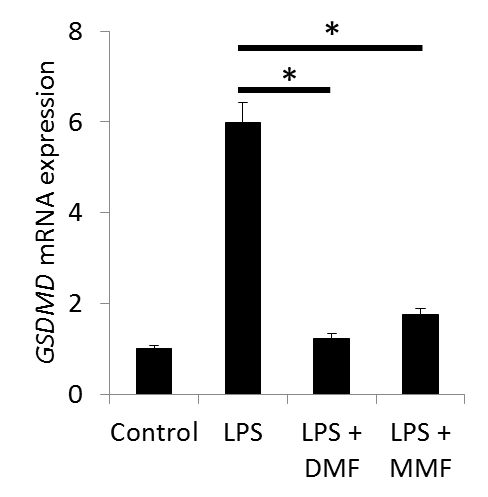
**

**Supplementary Figure 2.** RT-PCR data showing the mRNA expression of GSDMD gene expression in U937 cells. Cells were either left untreated (Control), treated with 10 μg/ml LPS or LPS plus 100 μM of either DMF or MMF in the presence of 200 IU/ml IL-2. *P<0.01 comparing the gene expression of GSDMD in the presence of LPS vs. in the presence of LPS plus DMF or MMF
